# Supplementary material for: Antibody evasion by SARS-CoV-2 Omicron subvariants BA.2.12.1, BA.4, and BA.5
Source: bioRxiv or medRxiv preprint supplement (doi:10.1101/2022.05.26.493517), 2022-06-27
Supplement: Supplementary file [file media-1.pdf]

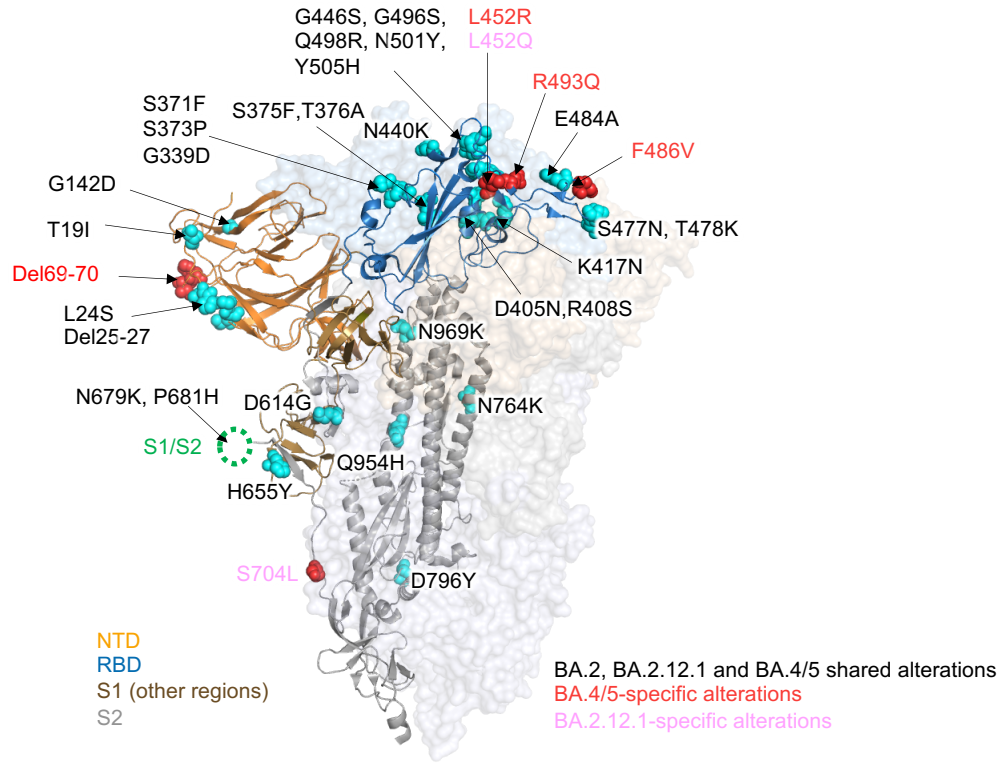

**Extended Data Fig. 1 | Mutations within BA.2, BA.2.12.1 and BA.4/5 denoted on the full SARS-CoV-2 spike trimer.** The green circle shows the S1/S2 cleavage site. The SARS-CoV-2 spike structure was downloaded from PDB 6ZGE.

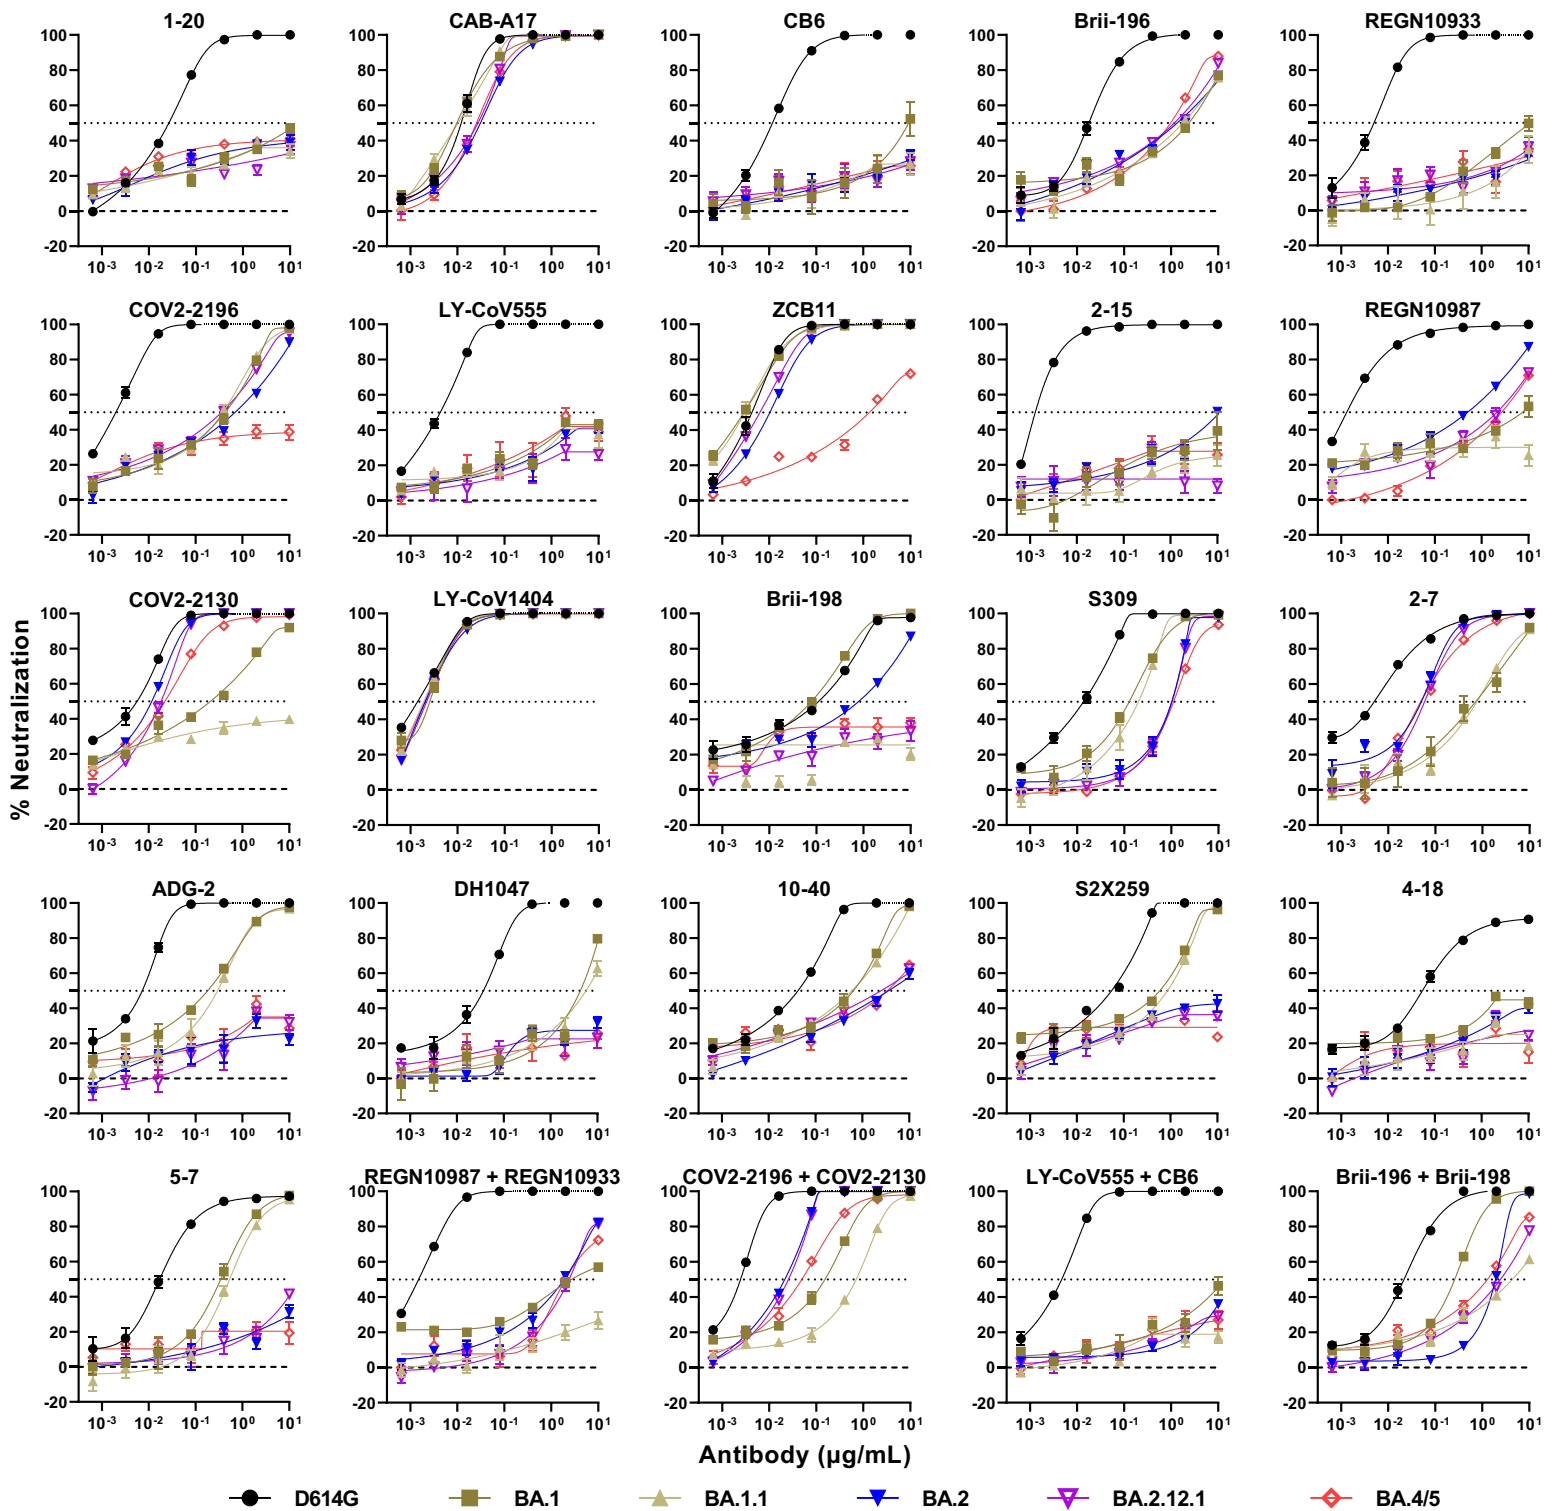

**Extended Data Fig. 2 | Pseudovirus neutralization curves of D614G and Omicron subvariants by monoclonal antibodies.** Data are shown as mean  $\pm$  standard error of mean (SEM) from three technical replicates.



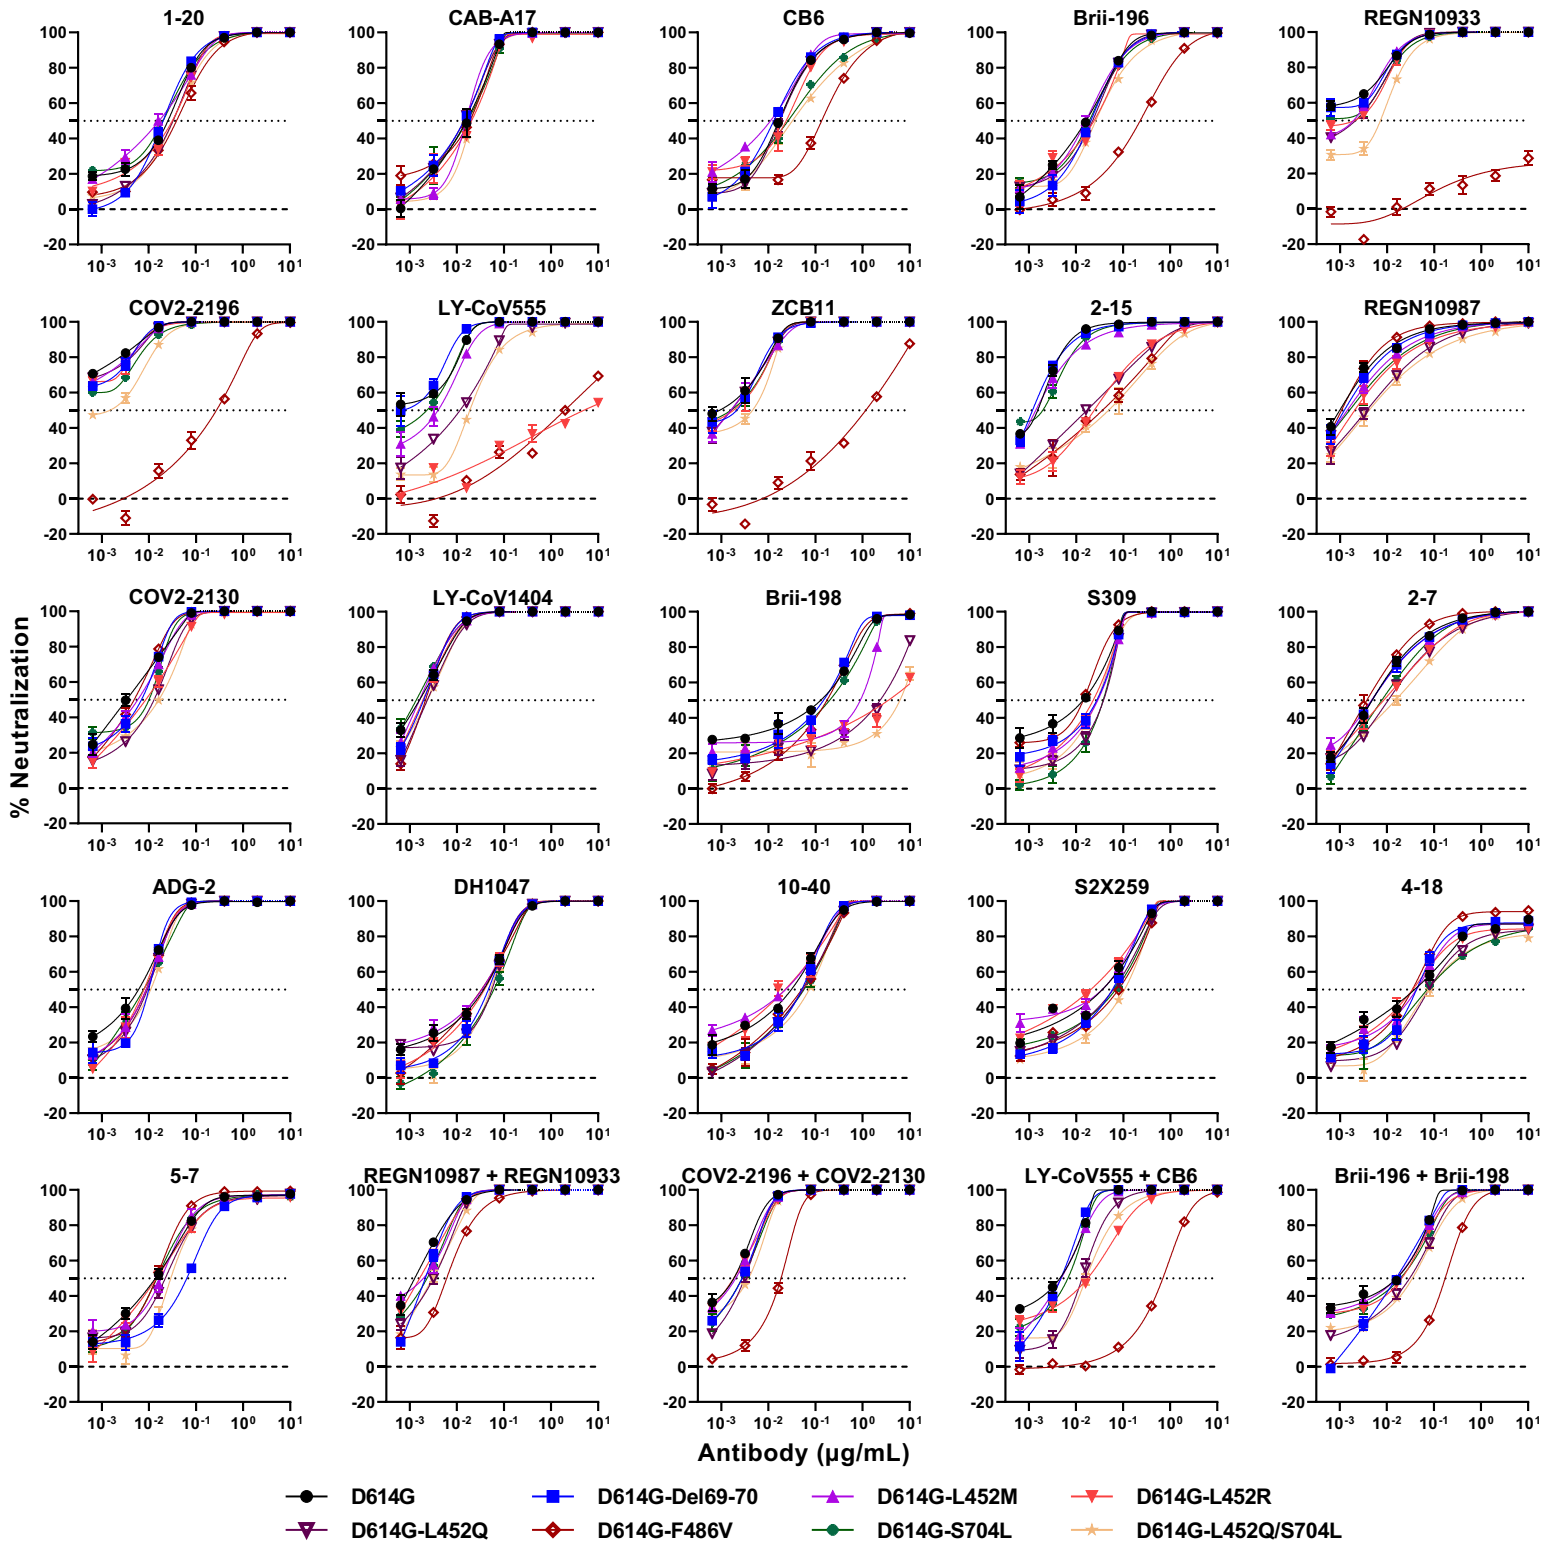

**Extended Data Fig. 4 | Neutralization curves for monoclonal antibodies against individual SARS-CoV-2 mutations in the background of D614G. Data are shown as mean  $\pm$  SEM from three technical replicates.**

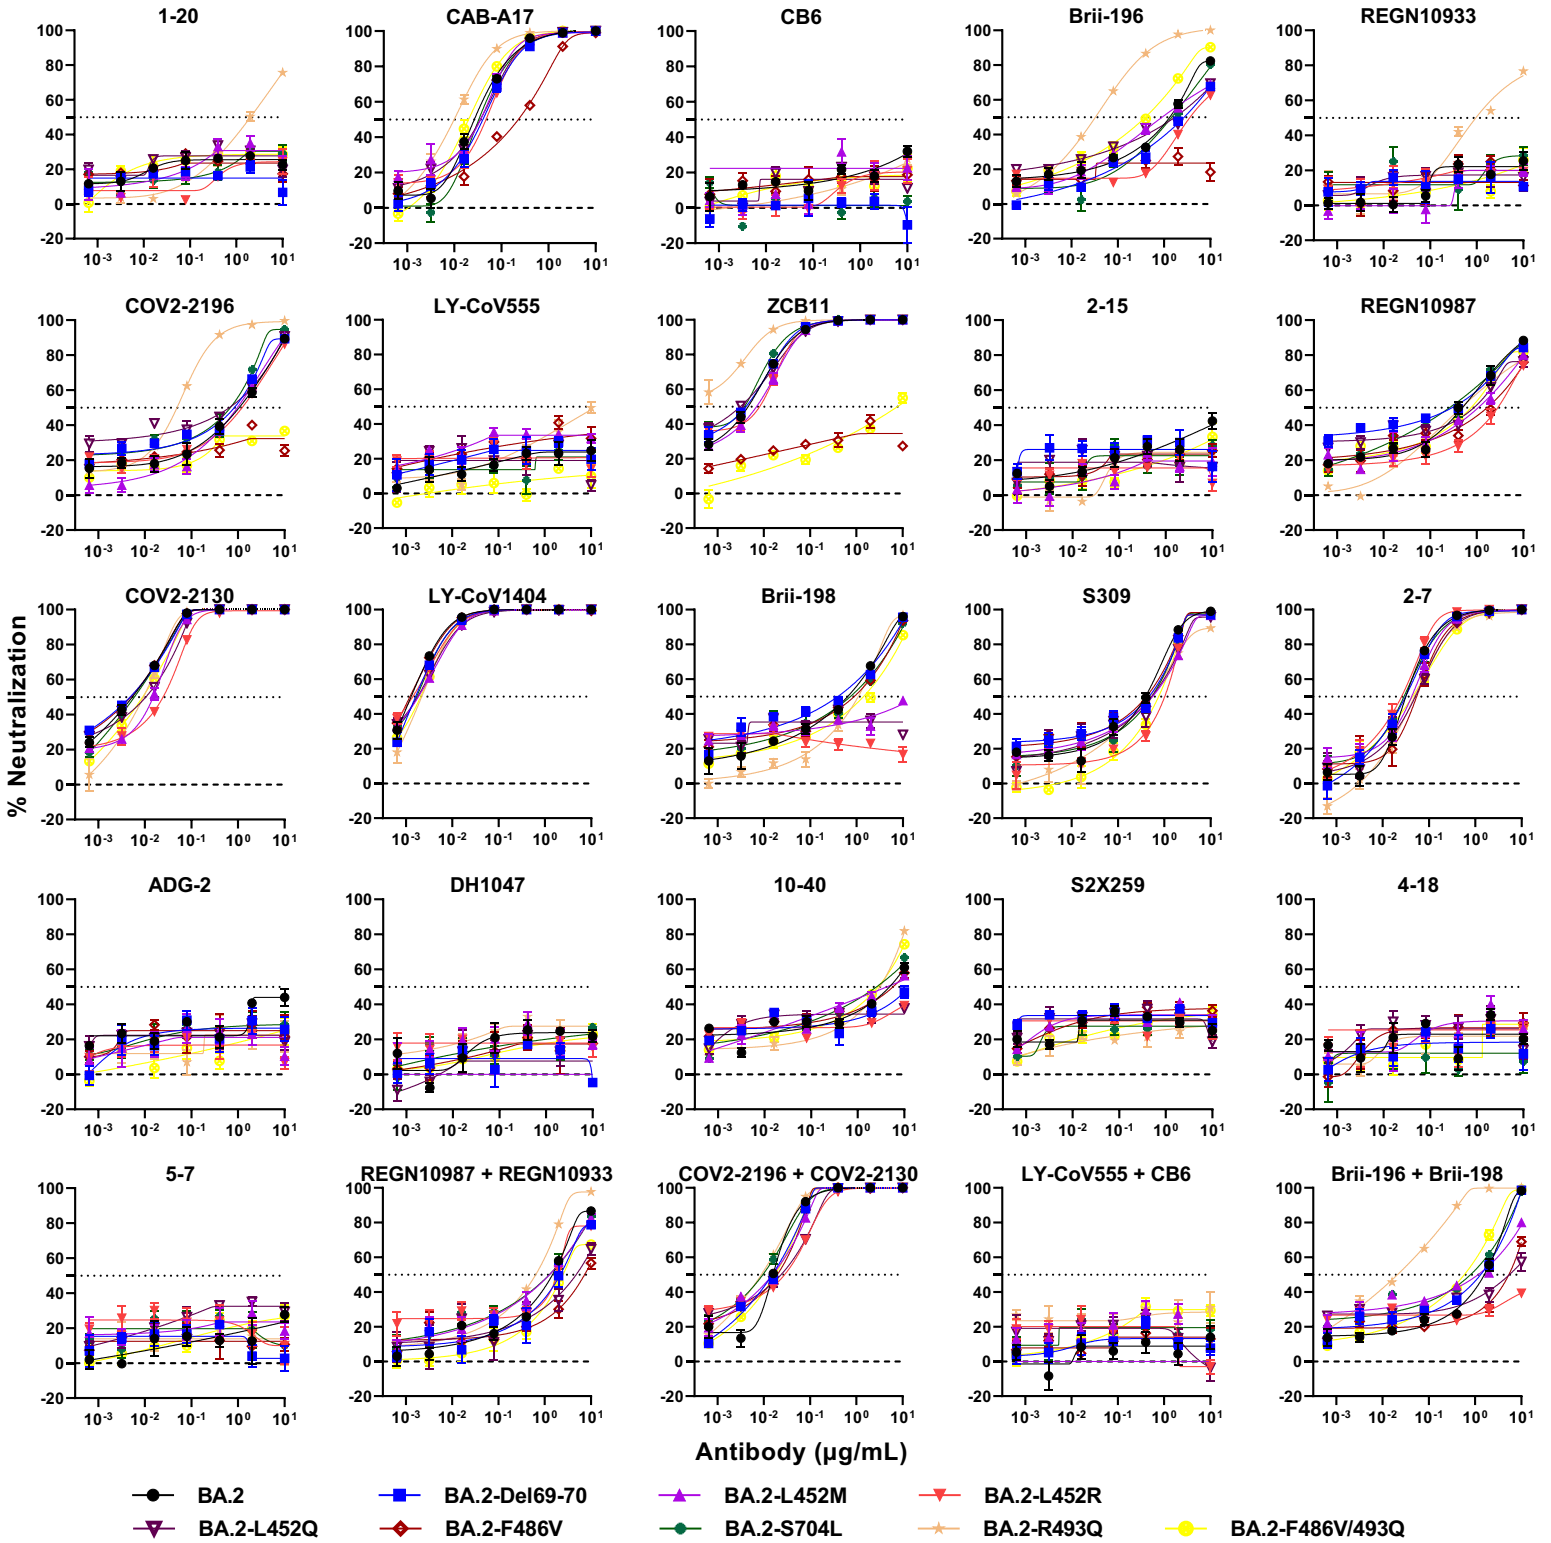

**Extended Data Fig. 5 | Neutralization curves for monoclonal antibodies against individual SARS-CoV-2 mutations in the background of BA.2. Data are shown as mean ± SEM from three technical replicates.**

**a**

| IC <sub>50</sub> (µg/mL) | RBD mAbs |         |       |          |            |           |           |       |       |            |           |            |          |       |         |       |        | NTD mAbs |       | Combination             |                       |                 |                     |       |        |
|--------------------------|----------|---------|-------|----------|------------|-----------|-----------|-------|-------|------------|-----------|------------|----------|-------|---------|-------|--------|----------|-------|-------------------------|-----------------------|-----------------|---------------------|-------|--------|
|                          | Class 1  |         |       |          | Class 2    |           |           |       |       | Class 3    |           |            |          |       | Class 4 |       |        | 4-18     | 5-7   | REGN 10987 + REGN 10933 | COV2-2196 + COV2-2130 | LY-Cov555 + CB6 | Brii-196 + Brii-198 |       |        |
|                          | 1-20     | CAB-A17 | CB6   | Brii-196 | REGN 10933 | COV2-2196 | LY-Cov555 | ZCB11 | 2-15  | REGN 10987 | COV2-2130 | LY-CoV1404 | Brii-198 | S309  | 2-7     | ADG-2 | DH1047 |          |       |                         |                       |                 |                     | 10-40 | S2X259 |
| D614G                    | 0.026    | 0.016   | 0.017 | 0.016    | <0.001     | <0.001    | 0.002     | 0.002 | 0.002 | 0.001      | 0.003     | 0.002      | 0.129    | 0.014 | 0.005   | 0.006 | 0.037  | 0.031    | 0.036 | 0.038                   | 0.014                 | 0.001           | 0.002               | 0.005 | 0.016  |
| D614G-Del69-70           | 0.020    | 0.014   | 0.013 | 0.021    | <0.001     | <0.001    | 0.001     | 0.002 | 0.001 | 0.001      | 0.007     | 0.002      | 0.148    | 0.028 | 0.005   | 0.010 | 0.047  | 0.051    | 0.059 | 0.042                   | 0.064                 | 0.002           | 0.003               | 0.005 | 0.016  |
| D614G-L452M              | 0.017    | 0.016   | 0.011 | 0.016    | 0.002      | <0.001    | 0.004     | 0.002 | 0.001 | 0.001      | 0.006     | 0.002      | 0.892    | 0.029 | 0.005   | 0.009 | 0.034  | 0.023    | 0.036 | 0.042                   | 0.018                 | 0.002           | 0.002               | 0.005 | 0.016  |
| D614G-L452R              | 0.032    | 0.020   | 0.024 | 0.024    | 0.002      | <0.001    | 5.018     | 0.002 | 0.024 | 0.002      | 0.009     | 0.002      | 3.526    | 0.023 | 0.009   | 0.008 | 0.039  | 0.023    | 0.020 | 0.035                   | 0.014                 | 0.002           | 0.002               | 0.018 | 0.021  |
| D614G-L452Q              | 0.033    | 0.014   | 0.018 | 0.023    | 0.002      | <0.001    | 0.012     | 0.002 | 0.017 | 0.004      | 0.013     | 0.002      | 2.346    | 0.038 | 0.011   | 0.009 | 0.056  | 0.055    | 0.061 | 0.078                   | 0.022                 | 0.003           | 0.003               | 0.013 | 0.031  |
| D614G-F486V              | 0.039    | 0.019   | 0.135 | 0.231    | >10        | 0.272     | 1.961     | 1.174 | 0.036 | 0.001      | 0.005     | 0.002      | 0.175    | 0.014 | 0.004   | 0.009 | 0.033  | 0.051    | 0.079 | 0.034                   | 0.014                 | 0.006           | 0.019               | 0.701 | 0.174  |
| D614G-S704L              | 0.020    | 0.017   | 0.026 | 0.019    | <0.001     | <0.001    | 0.002     | 0.002 | 0.002 | 0.002      | 0.010     | 0.001      | 0.199    | 0.038 | 0.008   | 0.008 | 0.061  | 0.057    | 0.069 | 0.071                   | 0.015                 | 0.002           | 0.003               | 0.007 | 0.019  |
| D614G-L452Q/S704L        | 0.033    | 0.020   | 0.032 | 0.026    | 0.007      | 0.001     | 0.019     | 0.005 | 0.049 | 0.004      | 0.016     | 0.002      | 6.166    | 0.028 | 0.015   | 0.011 | 0.052  | 0.074    | 0.106 | 0.076                   | 0.029                 | 0.003           | 0.004               | 0.016 | 0.035  |

**b**

| IC <sub>50</sub> (µg/mL) | RBD mAbs |         |     |          |            |           |           |        |      |            |           |            |          |       |         |       |        | NTD mAbs |     | Combination             |                       |                 |                     |       |        |       |
|--------------------------|----------|---------|-----|----------|------------|-----------|-----------|--------|------|------------|-----------|------------|----------|-------|---------|-------|--------|----------|-----|-------------------------|-----------------------|-----------------|---------------------|-------|--------|-------|
|                          | Class 1  |         |     |          | Class 2    |           |           |        |      | Class 3    |           |            |          |       | Class 4 |       |        | 4-18     | 5-7 | REGN 10987 + REGN 10933 | COV2-2196 + COV2-2130 | LY-Cov555 + CB6 | Brii-196 + Brii-198 |       |        |       |
|                          | 1-20     | CAB-A17 | CB6 | Brii-196 | REGN 10933 | COV2-2196 | LY-Cov555 | ZCB11  | 2-15 | REGN 10987 | COV2-2130 | LY-CoV1404 | Brii-198 | S309  | 2-7     | ADG-2 | DH1047 |          |     |                         |                       |                 |                     | 10-40 | S2X259 |       |
| BA.2                     | >10      | 0.027   | >10 | 1.329    | >10        | 1.060     | >10       | 0.005  | >10  | 0.495      | 0.005     | 0.001      | 0.642    | 0.393 | 0.032   | >10   | >10    | 4.824    | >10 | >10                     | >10                   | >10             | 1.475               | 0.016 | >10    | 1.592 |
| BA.2-Del69-70            | >10      | 0.040   | >10 | 2.726    | >10        | 0.835     | >10       | 0.004  | >10  | 0.298      | 0.005     | 0.002      | 0.394    | 0.469 | 0.031   | >10   | >10    | >10      | >10 | >10                     | >10                   | >10             | 2.178               | 0.015 | >10    | 1.320 |
| BA.2-L452M               | >10      | 0.036   | >10 | 0.907    | >10        | 0.970     | >10       | 0.007  | >10  | 1.081      | 0.015     | 0.002      | >10      | 0.557 | 0.042   | >10   | >10    | 4.246    | >10 | >10                     | >10                   | >10             | 1.276               | 0.015 | >10    | 1.163 |
| BA.2-L452R               | >10      | 0.047   | >10 | 6.815    | >10        | 1.228     | >10       | 0.008  | >10  | 2.832      | 0.025     | 0.001      | >10      | 1.022 | 0.026   | >10   | >10    | >10      | >10 | >10                     | >10                   | >10             | 1.864               | 0.028 | >10    | >10   |
| BA.2-L452Q               | >10      | 0.036   | >10 | 1.717    | >10        | 0.655     | >10       | 0.003  | >10  | 0.872      | 0.010     | 0.002      | >10      | 0.535 | 0.051   | >10   | >10    | >10      | >10 | >10                     | >10                   | >10             | 4.793               | 0.024 | >10    | 5.525 |
| BA.2-F486V               | >10      | 0.229   | >10 | >10      | >10        | >10       | >10       | >10    | >10  | 1.681      | 0.005     | 0.001      | 0.887    | 0.412 | 0.054   | >10   | >10    | 5.759    | >10 | >10                     | >10                   | >10             | 7.366               | 0.020 | >10    | 5.377 |
| BA.2-R493Q               | 2.020    | 0.010   | >10 | 0.033    | 0.960      | 0.049     | >10       | <0.001 | >10  | 0.454      | 0.009     | 0.002      | 1.089    | 0.485 | 0.049   | >10   | >10    | 3.008    | >10 | >10                     | >10                   | >10             | 0.641               | 0.009 | >10    | 0.021 |
| BA.2-S704L               | >10      | 0.033   | >10 | 1.464    | >10        | 0.686     | >10       | 0.004  | >10  | 0.262      | 0.006     | 0.002      | 0.735    | 0.539 | 0.029   | >10   | >10    | 2.537    | >10 | >10                     | >10                   | >10             | 1.262               | 0.010 | >10    | 0.800 |
| BA.2-F486V/R493Q         | >10      | 0.020   | >10 | 0.394    | >10        | >10       | >10       | 7.766  | >10  | 0.757      | 0.009     | 0.002      | 1.414    | 0.754 | 0.044   | >10   | >10    | 2.751    | >10 | >10                     | >10                   | >10             | 2.498               | 0.017 | >10    | 0.586 |

<0.01   <0.1   <1   <10   >10

**Extended Data Fig. 6 | Neutralization IC<sub>50</sub> values for monoclonal antibodies. IC<sub>50</sub> values of a, D614G carrying individual mutations; b, BA.2 carrying individual mutations.**

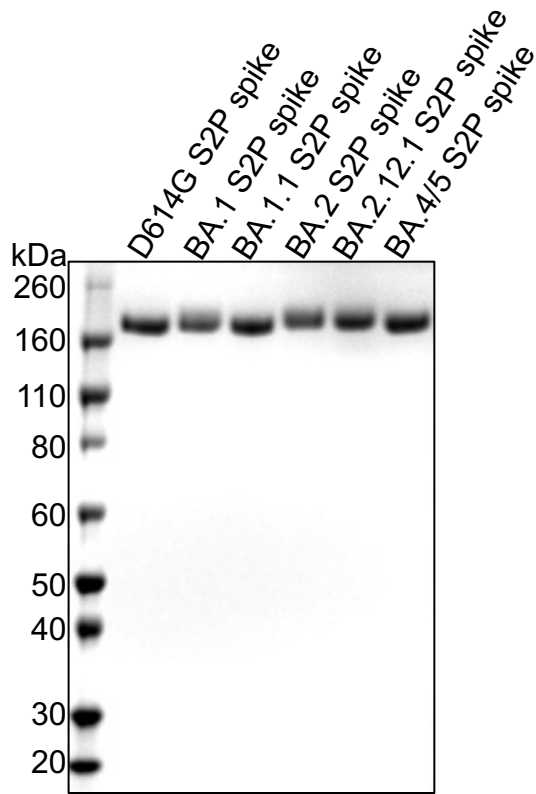

Extended Data Fig. 7 | SDS-polyacrylamide gel of purified spike trimers of D614G and Omicron subvariants.

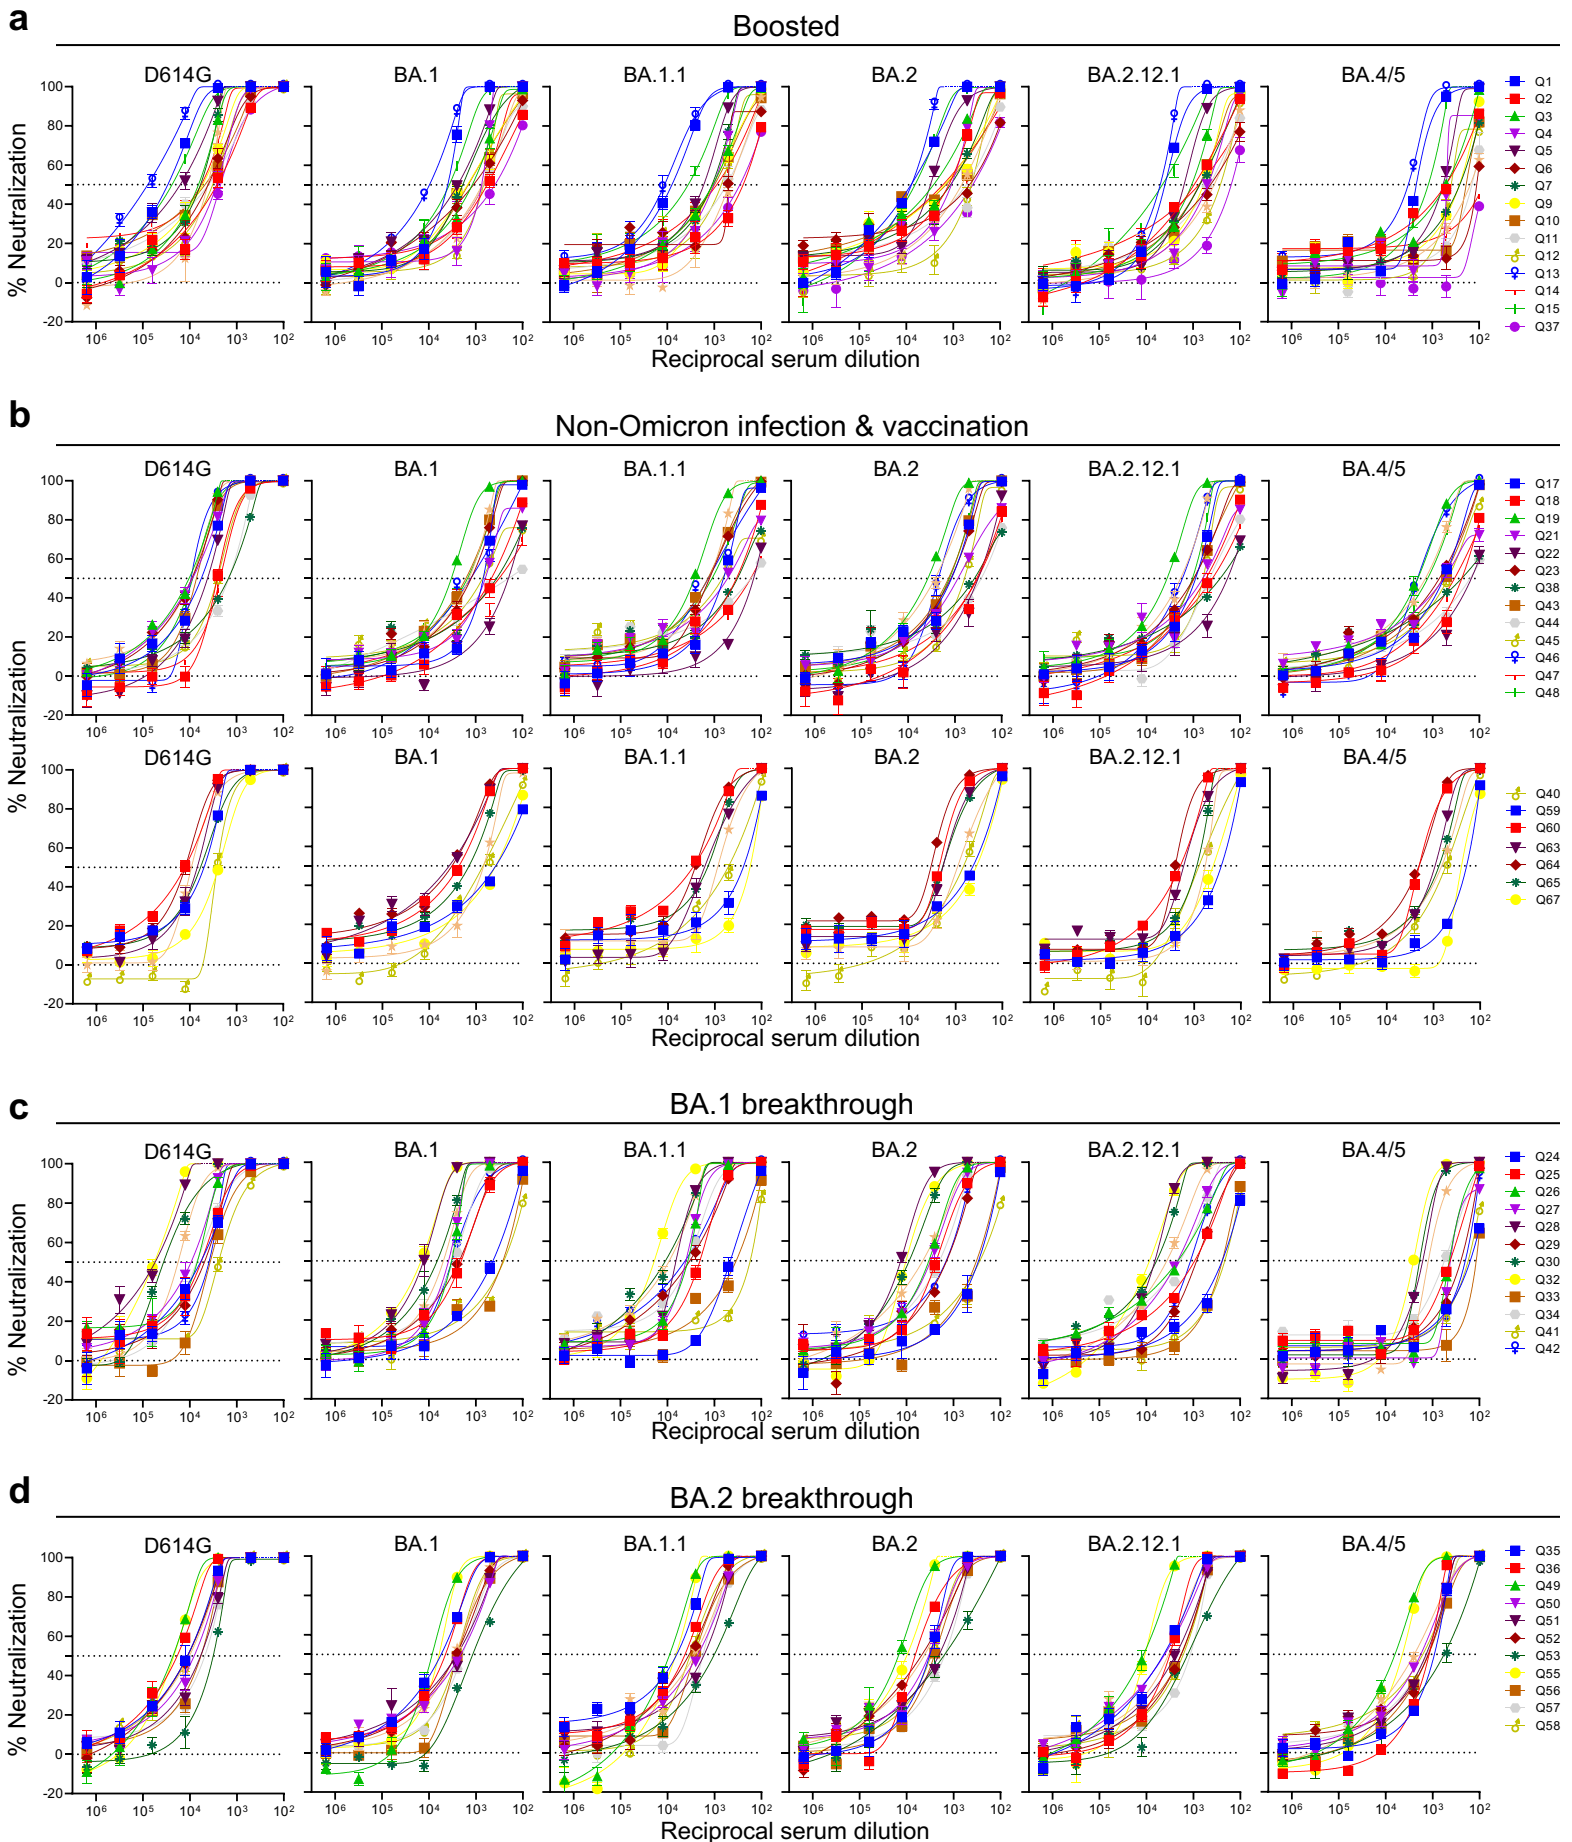

**Extended Data Fig. 8 | Neutralization curves of serum against D614G and Omicron sublineages.** Neutralization by **a**, boosted vaccinee sera. **b**, non-Omicron infection & vaccination sera. **c**, BA.1 breakthrough sera. **d**, BA.2 breakthrough sera. Error bars denote mean  $\pm$  SEM for three technical replicates.



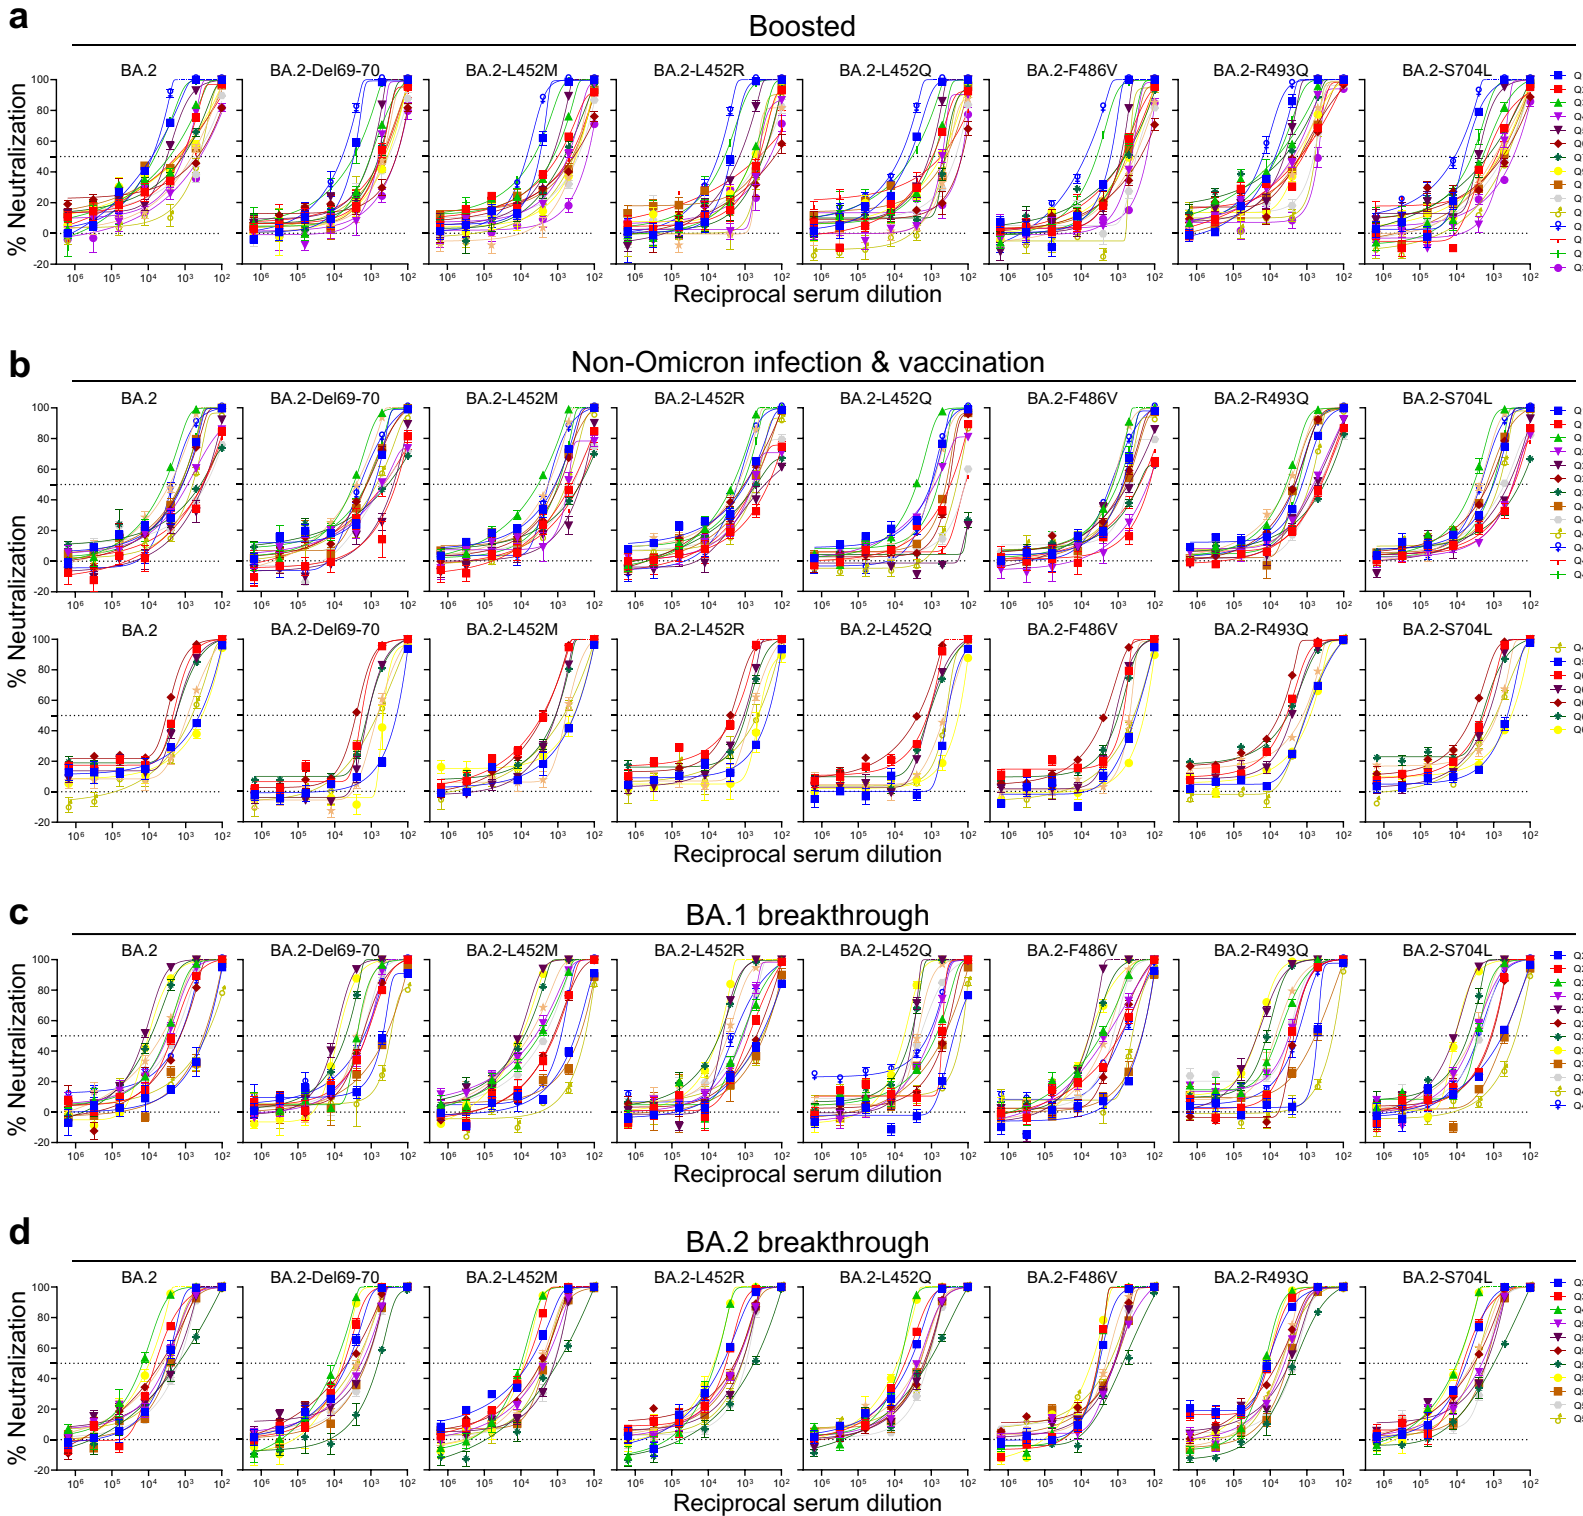

**Extended Data Fig. 9 | Neutralization curves of serum against BA.2 and BA.2 carrying individual mutations.** Neutralization by **a**, boosted vaccinee sera. **b**, non-Omicron infection & vaccination sera. **c**, BA.1 breakthrough sera. **d**, BA.2 breakthrough sera. Error bars denote mean  $\pm$  SEM for three technical replicates.

**Extended Data Table 1 | Mutation frequencies at position F486 within different SARS-CoV-2 variants.**

| Mutation | Count in BA.1 | Frequency in BA.1 | Count in BA.2 | Frequency in BA.2 | Count in other variants | Frequency in other variants |
|----------|---------------|-------------------|---------------|-------------------|-------------------------|-----------------------------|
| F486V    | 23            | 2.17E-06          | 134           | 1.26E-05          | 898                     | 8.48E-05                    |
| Del486   | 193           | 1.82E-05          | 549           | 5.18E-05          | 760                     | 7.17E-05                    |
| F486L    | 37            | 3.49E-06          | 10            | 9.44E-07          | 155                     | 1.46E-05                    |
| F486S    | 61            | 5.76E-06          | 10            | 9.44E-07          | 142                     | 1.34E-05                    |
| F486I    | 5             | 4.72E-07          | 2             | 1.89E-07          | 34                      | 3.21E-06                    |
| F486Y    | 12            | 1.13E-06          | 2             | 1.89E-07          | 20                      | 1.89E-06                    |
| F486W    | 8             | 7.55E-07          | 1             | 9.44E-08          | 10                      | 9.44E-07                    |
| F486T    | 5             | 4.72E-07          | 0             | 0                 | 5                       | 4.72E-07                    |
| F486E    | 2             | 1.89E-07          | 0             | 0                 | 3                       | 2.83E-07                    |
| F486N    | 2             | 1.89E-07          | 0             | 0                 | 3                       | 2.83E-07                    |
| F486H    | 2             | 1.89E-07          | 0             | 0                 | 2                       | 1.89E-07                    |
| F486P    | 2             | 1.89E-07          | 0             | 0                 | 2                       | 1.89E-07                    |
| F486R    | 1             | 9.44E-08          | 0             | 0                 | 2                       | 1.89E-07                    |
| F486C    | 0             | 0                 | 0             | 0                 | 1                       | 9.44E-08                    |
| F486G    | 1             | 9.44E-08          | 0             | 0                 | 1                       | 9.44E-08                    |
| F486M    | 0             | 0                 | 0             | 0                 | 1                       | 9.44E-08                    |
| F486Q    | 0             | 0                 | 1             | 9.44E-08          | 1                       | 9.44E-08                    |

**Extended Data Table 2 | Demographics on the clinical cohorts.**

| Sample ID                                      | Vaccine type and infected strain              | Days post-vaccination or *infection (after last exposure) | Documented COVID-19 | Age     | Gender   |
|------------------------------------------------|-----------------------------------------------|-----------------------------------------------------------|---------------------|---------|----------|
| <b>Boosted</b>                                 |                                               |                                                           |                     |         |          |
| Q1                                             | mRNA-1273/mRNA-1273/mRNA-1273                 | 29                                                        | No                  | 66      | Female   |
| Q2                                             | BNT162b2/BNT162b2/BNT162b2                    | 30                                                        | No                  | 68      | Male     |
| Q3                                             | BNT162b2/BNT162b2/BNT162b2                    | 14                                                        | No                  | 64      | Female   |
| Q4                                             | BNT162b2/BNT162b2/BNT162b2                    | 34                                                        | No                  | 55      | Male     |
| Q5                                             | BNT162b2/BNT162b2/BNT162b2                    | 34                                                        | No                  | 45      | Male     |
| Q6                                             | BNT162b2/BNT162b2/BNT162b2                    | 15                                                        | No                  | 50      | Female   |
| Q7                                             | BNT162b2/BNT162b2/BNT162b2                    | 15                                                        | No                  | 48      | Female   |
| Q8                                             | BNT162b2/BNT162b2/BNT162b2                    | 29                                                        | No                  | 71      | Male     |
| Q9                                             | BNT162b2/BNT162b2/BNT162b2                    | 90                                                        | No                  | 59      | Male     |
| Q10                                            | BNT162b2/BNT162b2/BNT162b2                    | 33                                                        | No                  | 45      | Male     |
| Q11                                            | BNT162b2/BNT162b2/BNT162b2                    | 87                                                        | No                  | 66      | Female   |
| Q12                                            | BNT162b2/BNT162b2/BNT162b2                    | 84                                                        | No                  | 26      | Male     |
| Q13                                            | mRNA-1273/mRNA-1273/mRNA-1273                 | 23                                                        | No                  | 28      | Female   |
| Q14                                            | BNT162b2/BNT162b2/BNT162b2                    | 14                                                        | No                  | 78      | Male     |
| Q15                                            | BNT162b2/BNT162b2/mRNA-1273                   | 32                                                        | No                  | 39      | Male     |
| Q37                                            | BNT162b2/BNT162b2/BNT162b2                    | 20                                                        | No                  | Unknown | Female   |
| <b>Non-Omicron infection &amp; vaccination</b> |                                               |                                                           |                     |         |          |
| Q16                                            | R.1/mRNA-1273/mRNA-1273                       | 7                                                         | Yes                 | 64      | Female   |
| Q17                                            | R.1/mRNA-1273/mRNA-1273                       | 7                                                         | Yes                 | 34      | Female   |
| Q18                                            | R.1/mRNA-1273/mRNA-1273                       | 28                                                        | Yes                 | 52      | Male     |
| Q19                                            | R.1/mRNA-1273/mRNA-1273                       | 21                                                        | Yes                 | 67      | Female   |
| Q20                                            | R.1/mRNA-1273/mRNA-1273                       | >28                                                       | Yes                 | 69      | Male     |
| Q21                                            | R.1/mRNA-1273/mRNA-1273                       | >28                                                       | Yes                 | 57      | Female   |
| Q22                                            | BNT162b2/B.1.526                              | *89                                                       | Yes                 | 42      | Male     |
| Q23                                            | BNT162b2/B.1.526                              | *82                                                       | Yes                 | 32      | Male     |
| Q38                                            | BNT162b2/B.1.1.7                              | *59                                                       | Yes                 | 22      | Female   |
| Q39                                            | BNT162b2/B.1.1.7                              | *213                                                      | Yes                 | 66      | Male     |
| Q40                                            | BNT162b2/B.1.617.2                            | *31                                                       | Yes                 | 50      | Female   |
| Q43                                            | BNT162b2/BNT162b2/B.1.526                     | *62                                                       | Yes                 | 3       | Male     |
| Q44                                            | WA1/mRNA-1273/mRNA-1273                       | 114                                                       | Yes                 | 49      | Female   |
| Q45                                            | WA1/BNT162b2/BNT162b2                         | 57                                                        | Yes                 | 35      | Female   |
| Q46                                            | WA1/BNT162b2/BNT162b2                         | 46                                                        | Yes                 | 30      | Female   |
| Q47                                            | WA1/BNT162b2/BNT162b2                         | 57                                                        | Yes                 | 32      | Female   |
| Q48                                            | WA1/BNT162b2/BNT162b2                         | 50                                                        | Yes                 | 64      | Female   |
| Q59                                            | BNT162b2/BNT162b2/B.1.617.2                   | *35                                                       | Yes                 | 58      | Female   |
| Q60                                            | B.1.617.2/BNT162b2/BNT162b2                   | 40                                                        | Yes                 | 61      | Male     |
| Q63                                            | BNT162b2/BNT162b2/B.1.617.2                   | *30                                                       | Yes                 | 40      | Female   |
| Q64                                            | mRNA-1273/mRNA-1273/B.1.617.2                 | *66                                                       | Yes                 | 29      | Male     |
| Q65                                            | BNT162b2/BNT162b2/B.1.617.2                   | *62                                                       | Yes                 | 33      | Female   |
| Q66                                            | BNT162b2/BNT162b2/B.1.617.2                   | *60                                                       | Yes                 | 42      | Female   |
| Q67                                            | BNT162b2/BNT162b2/B.1.617.2                   | *73                                                       | Yes                 | 37      | Male     |
| <b>BA.1 breakthrough</b>                       |                                               |                                                           |                     |         |          |
| Q24                                            | BNT162b2/BNT162b2/BA.1                        | *14                                                       | Yes                 | Unknown | Unknown  |
| Q25                                            | BNT162b2/BNT162b2/BA.1                        | *14                                                       | Yes                 | Unknown | Unknown  |
| Q26                                            | mRNA-1273/mRNA-1273/BA.1                      | *35                                                       | Yes                 | Unknown | Unknown  |
| Q27                                            | BNT162b2/BNT162b2/BNT162b2/BA.1               | *135                                                      | Yes                 | 78      | Male     |
| Q28                                            | BNT162b2/BNT162b2/BNT162b2/BA.1               | *14                                                       | Yes                 | Unknown | Unknown  |
| Q29                                            | BNT162b2/BNT162b2/BNT162b2/BA.1               | *14                                                       | Yes                 | Unknown | Unknown  |
| Q30                                            | BNT162b2/BNT162b2/BNT162b2/BA.1               | *14                                                       | Yes                 | Unknown | Unknown  |
| Q31                                            | BNT162b2/BNT162b2/BNT162b2/BA.1               | *41                                                       | Yes                 | 48      | Male     |
| Q32                                            | BNT162b2/BNT162b2/BNT162b2/BA.1               | *26                                                       | Yes                 | 38      | Female   |
| Q33                                            | BNT162b2/BNT162b2/B.1.617.2/BNT162b2/BA.1     | *19                                                       | Yes                 | 35      | Female   |
| Q34                                            | BNT162b2/BNT162b2/mRNA-1273/mRNA-1273/BA.1    | *67                                                       | Yes                 | 40      | Male     |
| Q41                                            | WA1/BNT162b2/BA.1                             | *21                                                       | Yes                 | 52      | Male     |
| Q42                                            | WA1/BNT162b2/BA.1                             | *44                                                       | Yes                 | 37      | Intersex |
| <b>BA.2 breakthrough</b>                       |                                               |                                                           |                     |         |          |
| Q35                                            | BNT162b2/BNT162b2/BA.2                        | *14                                                       | Yes                 | 50      | Female   |
| Q36                                            | BNT162b2/BNT162b2/BNT162b2/Ad26.COVID2.S/BA.2 | *22                                                       | Yes                 | 69      | Male     |
| Q49                                            | BNT162b2/BNT162b2/mRNA-1273/BA.2              | *16                                                       | Yes                 | 32      | Male     |
| Q50                                            | mRNA-1273/mRNA-1273/mRNA-1273/BA.2            | *14                                                       | Yes                 | 34      | Male     |
| Q51                                            | BNT162b2/BNT162b2/mRNA-1273/BA.2              | *19                                                       | Yes                 | 33      | Female   |
| Q52                                            | BNT162b2/BNT162b2/mRNA-1273/BA.2              | *18                                                       | Yes                 | 29      | Female   |
| Q53                                            | BNT162b2/BNT162b2/BNT162b2/BA.2               | *25                                                       | Yes                 | 34      | Male     |
| Q54                                            | BNT162b2/BNT162b2/BNT162b2/BA.2               | *36                                                       | Yes                 | 37      | Female   |
| Q55                                            | BNT162b2/BNT162b2/mRNA-1273/BA.2              | *18                                                       | Yes                 | 41      | Female   |
| Q56                                            | mRNA-1273/mRNA-1273/mRNA-1273/BA.2            | *21                                                       | Yes                 | 36      | Female   |
| Q57                                            | BNT162b2/BNT162b2/mRNA-1273/BA.2              | *32                                                       | Yes                 | 28      | Male     |
| Q58                                            | BNT162b2/BNT162b2/mRNA-1273/BA.2              | *23                                                       | Yes                 | 33      | Female   |

### Extended Data Table 3 | Oligos used to construct spike expression plasmids.

| Oligo name | Targeted mutation | Oligo sequence                                |
|------------|-------------------|-----------------------------------------------|
| WQ-1       |                   | TCTTCCTGAACAGTCTGTACTGGTAGTTGTAGTTGCCTCC      |
| WQ-2       | L452Q             | GGAGGCAACTACAACACTACCAGTACAGACTGTTCAGGAAGA    |
| WQ-3       |                   | TCTTCCTGAACAGTCTGTACATGTAGTTGTAGTTGCCTCCC     |
| WQ-4       | L452M             | GGGAGGCAACTACAACACTACATGTACAGACTGTTCAGGAAGA   |
| WQ-5       |                   | TCCTGAACAGTCTGTAGCGGTAGTTGTAGTTGCCT           |
| WQ-6       | L452R             | AGGCAACTACAACACTACCGCTACAGACTGTTCAGGA         |
| WQ-7       |                   | GTTGTTGCTGTAAGCCACTAAGTTCTCTGCTCCCAGAC        |
| WQ-8       | S704L             | GTCTGGGAGCAGAGAACTTAGTGGCTTACAGCAACAAC        |
| WQ-9       |                   | TCTGGACCTCAGCCTCCGGCGGGTCCAGTCTGCTCAGGA       |
| WQ-10      | 2P_K986P/V987P    | TCCTGAGCAGACTGGACCCGCCGGAGGCTGAGGTCCAGA       |
| WQ-11      |                   | GCTTGCCACAGAGCTTGCGCTCCCCTGGCTCTTGGT          |
| WQ-12      | Furin-mut         | ACCAAGAGCCACGGGAGCGCAAGCTCTGTGGCAAGC          |
| WQ-13      |                   | GTGGAAAAGTAACAGTTGACGCCCTCCACTCCATTAC         |
| WQ-14      |                   | GTAATGGAGTGGAGGGCGTCAACTGTTACTTTCCAC          |
| WQ-15      | F486V             | TGGAAAAGTAACAGTTGACGCCGGCCACTCCATTA           |
| WQ-16      |                   | TAATGGAGTGGCCGGCGTCAACTGTTACTTTCCA            |
| WQ-17      |                   | TGGTTCCATGCCATCTCTGGCACCAATGGC                |
| WQ-18      | Del69-70          | GCCATTGGTGCCAGAGATGGCATGGAACCA                |
| WQ-19      |                   | GGTTGGTCTGAAGCCATAGGACTGGAGTGGAAAGTAACAGTTGAC |
| WQ-20      | R493Q             | GTCAACTGTTACTTTCCACTCCAGTCTATGGCTTCAGACCAACC  |
